# Supplementary material for: Effect of Therapeutic Patient Education in Adults with Atopic Dermatitis: Analysis of Efficacy and Treatment Needs
Source: PubMed Central journal article supplement — Acta Derm Venereol. 2024 Dec 12;104:41184. doi: 10.2340/actadv.v104.41184 (PMC11681139; doi:10.2340/actadv.v104.41184), 2024-12-12
Supplement: ActaDV-104-41184-s1.pdf [file ActaDV-104-41184-s1.pdf]

Table SI. Estimated mean DLQI differences.

Bold font indicates a statistically significant result.

| <b>Modifiers</b>                                       | <b>Estimates</b> | <b>CI</b>     | <b>p-value</b>   |
|--------------------------------------------------------|------------------|---------------|------------------|
| TPE                                                    | -2.66            | -5.46 – 0.13  | 0.062            |
| Absent initial AD                                      | 4.77             | -4.01 – 13.56 | 0.285            |
| Mild initial AD                                        | 3.78             | 1.57 – 5.99   | <b>0.001</b>     |
| Severe initial AD                                      | -5.11            | -7.13 – -3.09 | <b>&lt;0.001</b> |
| Corrected age                                          | 0.06             | -0.01 – 0.13  | 0.090            |
| Sex (male)                                             | 2.33             | 0.55 – 4.10   | <b>0.011</b>     |
| Atopic comorbidity                                     | 0.51             | -1.70 – 2.73  | 0.649            |
| Presence of a systemic treatment at initial evaluation | 0.09             | -2.44 – 2.62  | 0.944            |
| Observations                                           | N=202            |               |                  |

Abbreviations: AD: atopic dermatitis, CI: confidence interval, DLQI: Dermatology Life Quality Index, TPE, therapeutic patient education.

Table SII. Estimated odds ratios of DLQI  $\leq 4$  at the final evaluation.

Bold font indicates a statistically significant result.

| <b>Modifiers</b>                                       | <b>Odds ratio</b> | <b>CI</b>    | <b>p-value</b> |
|--------------------------------------------------------|-------------------|--------------|----------------|
| TPE                                                    | 2.78              | 1.11 – 7.29  | <b>0.032</b>   |
| Absent initial AD                                      | 0.88              | 0.03 – 24.03 | 0.931          |
| Mild initial AD                                        | 2.11              | 0.90 – 5.35  | 0.097          |
| Severe initial AD                                      | 0.51              | 0.26 – 1.00  | 0.052          |
| Corrected age                                          | 1.00              | 0.97 – 1.02  | 0.780          |
| Sex (male)                                             | 0.99              | 0.53 – 1.88  | 0.983          |
| Atopic comorbidity                                     | 0.57              | 0.26 – 1.26  | 0.160          |
| Presence of a systemic treatment at initial evaluation | 1.37              | 0.57 – 3.46  | 0.492          |
| Observations                                           | N=211             |              |                |

Abbreviations: AD: atopic dermatitis, CI: confidence interval, DLQI: Dermatology Life Quality Index, TPE: therapeutic patient education.

Table SIII. Estimated odds ratios of AD improvement.

Bold font indicates a statistically significant result.

| <b>Modifiers</b>                                       | <b>Odds ratio</b> | <b>CI</b>     | <b>p-value</b>   |
|--------------------------------------------------------|-------------------|---------------|------------------|
| (Intercept)                                            | 0.51              | 0.15 – 1.55   | 0.250            |
| TPE group                                              | 7.43              | 2.60 – 23.37  | <b>&lt;0.001</b> |
| Mild initial AD                                        | 0.02              | 0.00 – 0.06   | <b>&lt;0.001</b> |
| Severe initial AD                                      | 4.99              | 2.07 – 13.61  | <b>0.001</b>     |
| Corrected age                                          | 1.08              | 1.03 – 1.14   | <b>0.004</b>     |
| Sex (male)                                             | 0.58              | 0.27 – 1.22   | 0.151            |
| Absence of atopic comorbidity                          | 24.74             | 3.34 – 250.13 | <b>0.004</b>     |
| Presence of a systemic treatment at initial evaluation | 0.60              | 0.22 – 1.64   | 0.309            |
| TPE group * Corrected age                              | 0.93              | 0.87 – 0.98   | <b>0.017</b>     |
| TPE group * Absence of atopic comorbidity              | 0.04              | 0.00 – 0.39   | <b>0.008</b>     |
| Observations                                           | N=254             |               |                  |

Abbreviations: AD: atopic dermatitis, CI: confidence interval, TPE: therapeutic patient education.

Table SIV. Estimated odds ratios of initiation of a systemic treatment during the study in the population of AD patients with topical treatment alone at the time of enrollment.

Bold font indicates a statistically significant result.

| <b>Modifiers</b>   | <b>Odds ratio</b> | <b>CI</b>    | <b>p-value</b>   |
|--------------------|-------------------|--------------|------------------|
| TPE                | 0.03              | 0.01 – 0.12  | <b>&lt;0.001</b> |
| Absent initial AD  | 0.22              | 0.01 – 3.05  | 0.271            |
| Mild initial AD    | 0.40              | 0.05 – 1.94  | 0.303            |
| Severe initial AD  | 13.22             | 5.00 – 40.11 | <b>&lt;0.001</b> |
| Corrected age      | 1.01              | 0.97 – 1.04  | 0.616            |
| Sex (male)         | 1.33              | 0.53 – 3.33  | 0.541            |
| Atopic comorbidity | 0.99              | 0.25 – 3.49  | 0.994            |
| Observations       | N=187             |              |                  |

Abbreviations: AD : atopic dermatitis, CI : confidence interval, TPE : therapeutic patient education.
